# Supplementary material
Source: publisher site journal article supplement (https://www.dovepress.com/article/94410)

**Supplementary Table 1. Pathogen-associated molecular patterns (PAMPs) and corresponding Toll-like receptors that recognize each PAMP and the assigned study ID used in the protocol for each PAMP concentration.**

| <b>PAMP</b>                        | <b>Toll-like Receptor</b> | <b>Concentration</b>   | <b>Assigned study PAMP ID #</b> |
|------------------------------------|---------------------------|------------------------|---------------------------------|
| Media                              | NA                        | NA                     | 4                               |
| Pam3Cys                            | TLR1/TLR2                 | Pam3Cys at 10 ng/ml    | 5                               |
|                                    |                           | Pam3Cys at 100 ng/ml   | 6                               |
| Zymosan                            | TLR2/TLR6                 | Zymosan at 10 mcg/ml   | 19                              |
|                                    |                           | Zymosan at 100 mcg/ml  | 20                              |
| Dyacylated lipoprotein (Pam2)      | TLR2/TLR6                 | FSL at 10 ng/ml        | 21                              |
|                                    |                           | FSL at 100 ng/ml       | 22                              |
| Smooth form LPS from E. Coli       | TLR4                      | O111:B4 at 0.1 ng/ml   | 32                              |
|                                    |                           | O111:B4 at 1 ng/ml     | 23                              |
|                                    |                           | O111:B4 at 10 ng/ml    | 1                               |
| Rough form LPS from salmonella     | TLR4                      | Re595UP at 0.01 ng/ml  | 33                              |
|                                    |                           | Re595UP at 0.1 ng/ml   | 27                              |
|                                    |                           | Re595UP at 1 ng/ml     | 11                              |
| Flagellin from S. typhimurium      | TLR5                      | Flagellin at 100 ng/ml | 2                               |
| Imidazoquinoline compound from RNA | TLR7/TLR8                 | R848 at 0.1 $\mu$ M    | 25                              |
|                                    |                           | R848 at 1 $\mu$ M      | 26                              |

Supplementary Figure 1: Heat map showing models with a false discovery rate < 0.10 comparing cytokine levels for subjects with and without severe COPD or chronic bronchitis for each PAMP-cytokine level pair\*.

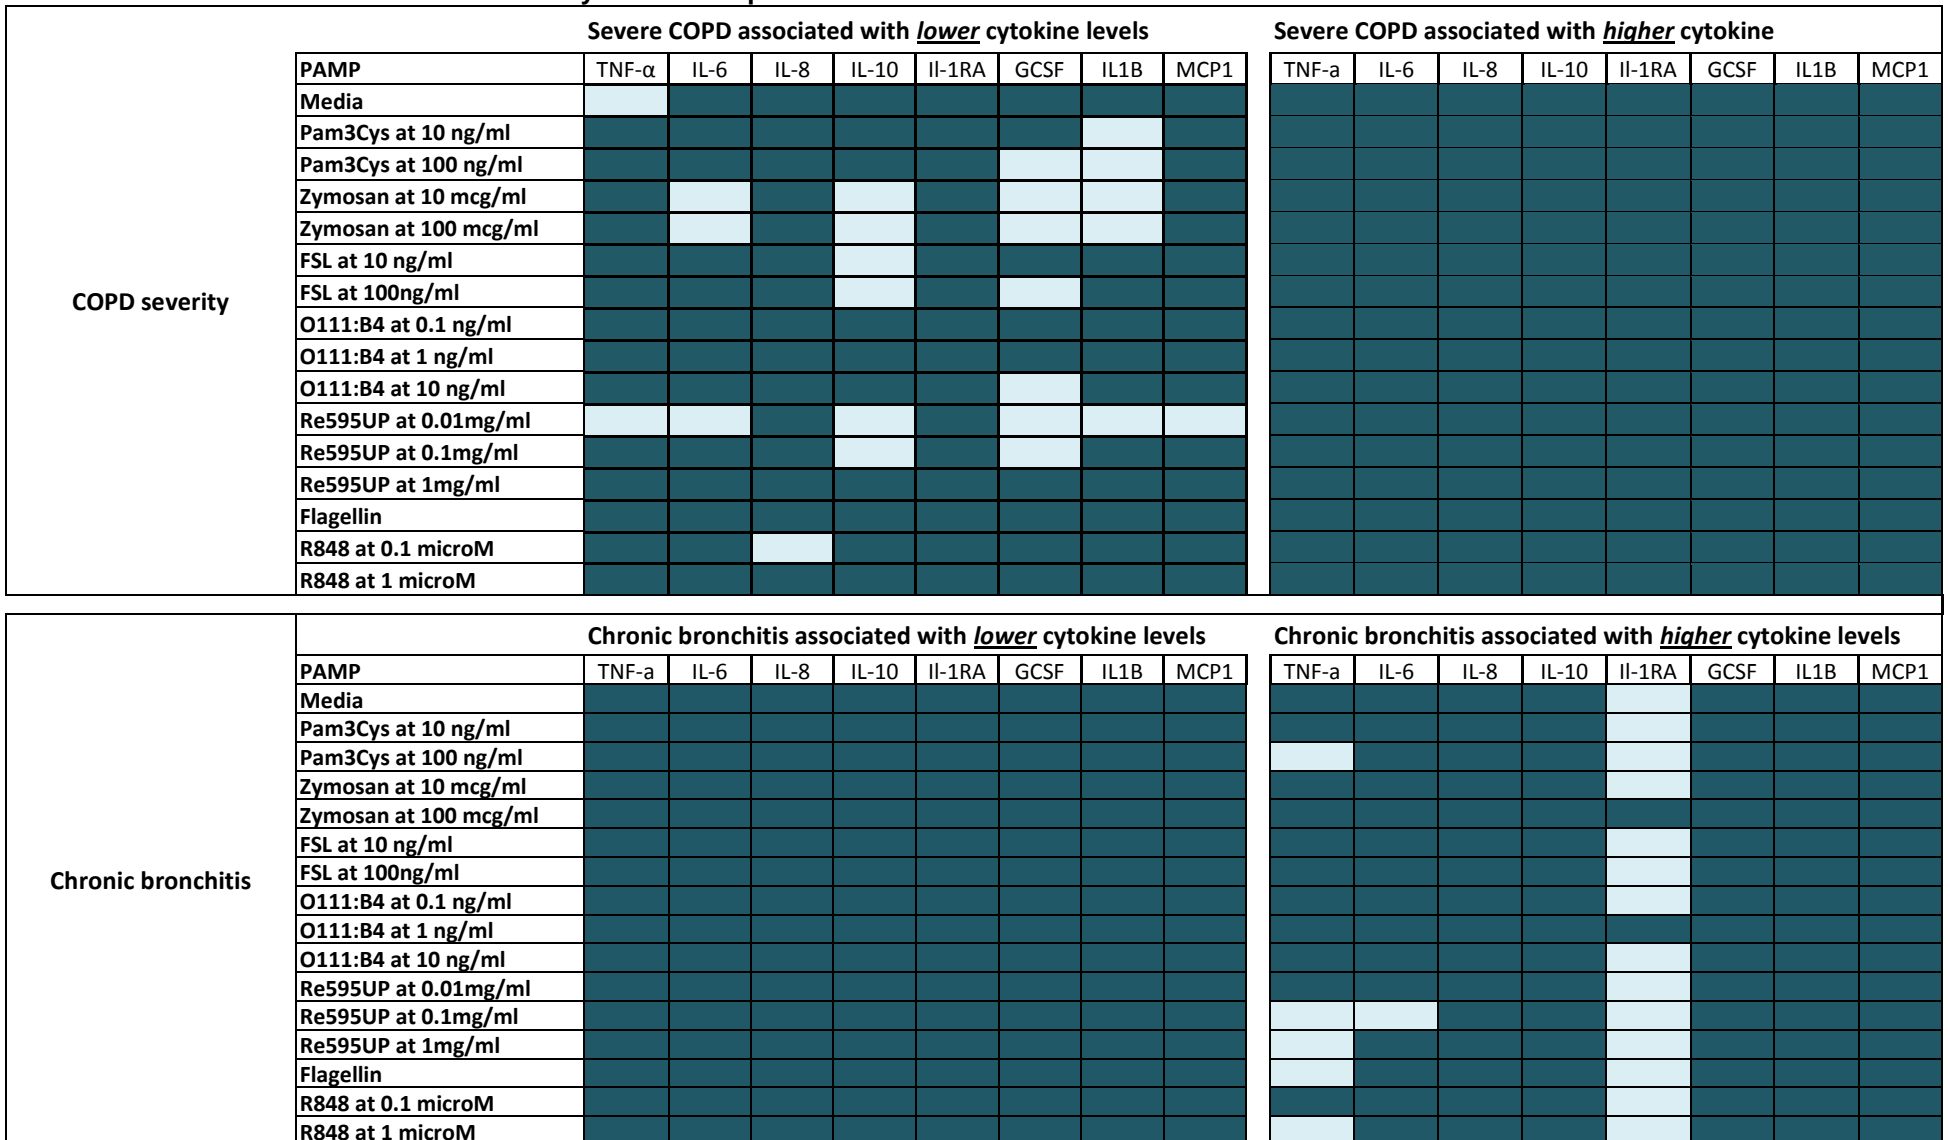

\* Each square corresponds to the q-value for one t-test comparing cytokine levels after stimulation with a PAMP between subjects with and without chronic bronchitis. For example the square in the upper right corner shows the q-value for the t-test comparing MCP-1 levels in response to media (no PAMP) between those with and without chronic bronchitis

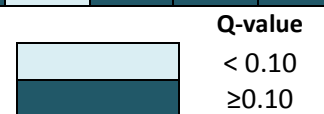

**Supplementary Figure 2: Heat map showing the strength of tests of associations comparing cytokine levels for subjects using inhaled steroids and those not using inhaled steroids for each PAMP-cytokine level pair stratified by inhaled steroid use.\***

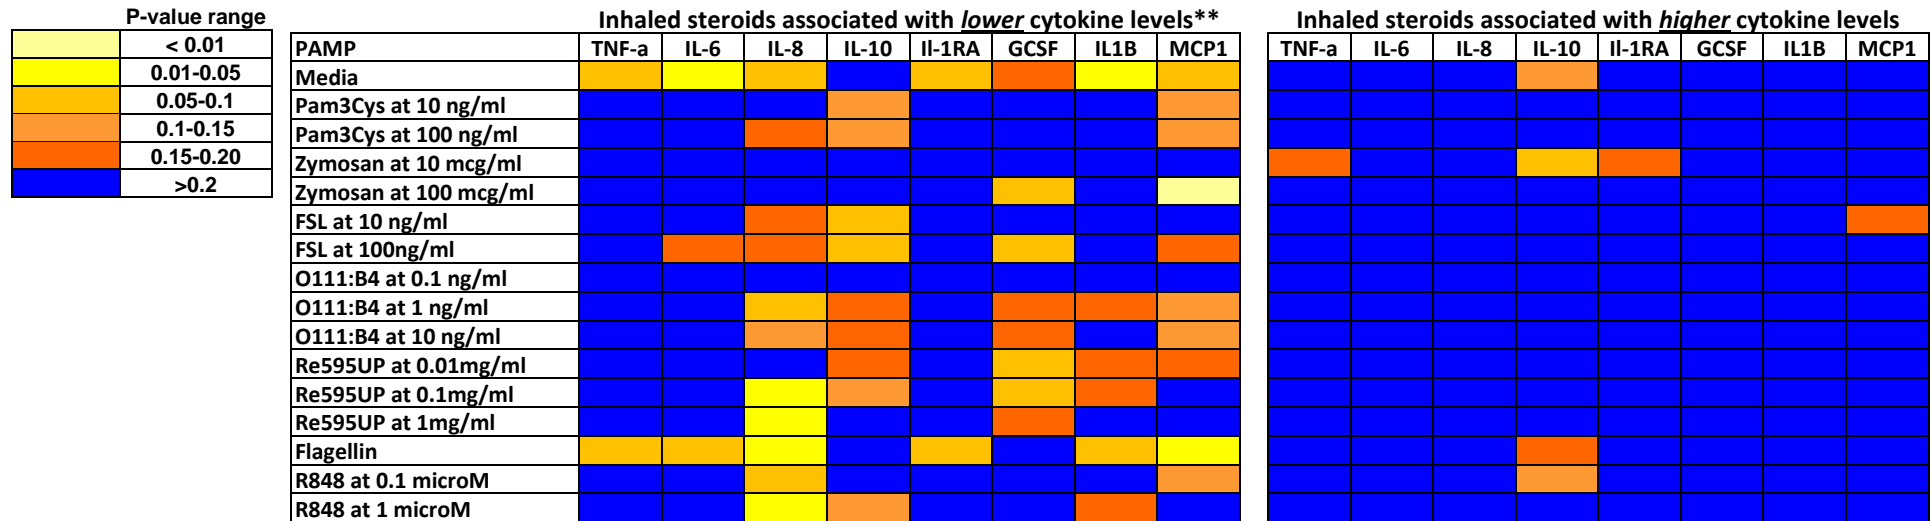

\* Each square corresponds to the p-value for one t-test comparing cytokine levels after stimulation with a PAMP between subjects with and without severe COPD. For example the square in the upper right corner shows the P-value for the t-test comparing MCP-1 levels in response to media (no PAMP) between those with and without severe COPD.

\*\* t-test comparing the mean log-transformed cytokine values for a given PAMP between subjects with and without severe COPD

Supplementary Figure 3: Heat map showing the strength of tests of associations comparing cytokine levels for subjects with and without severe COPD for each PAMP-cytokine level pair stratified by inhaled steroid use.\*

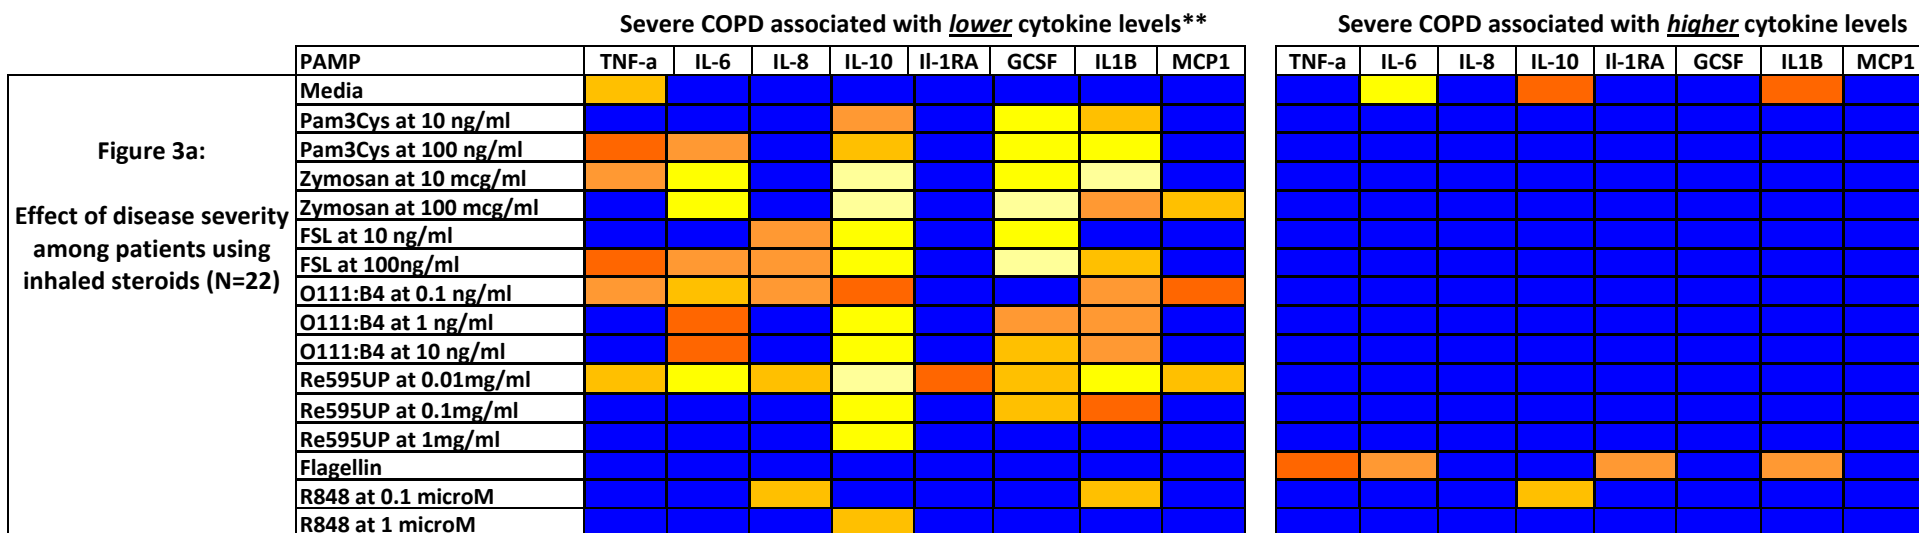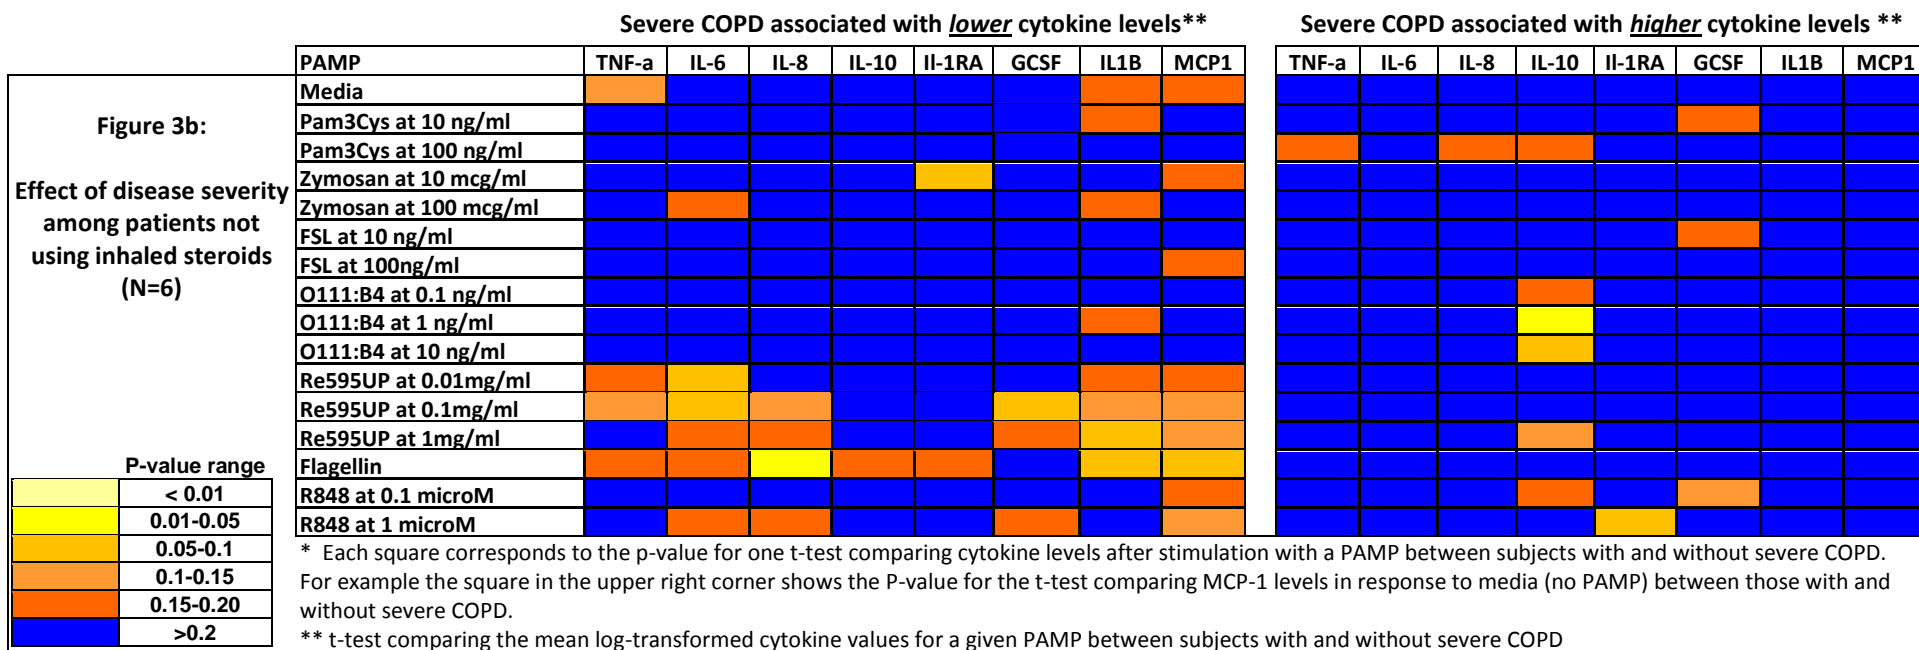

Supplement: Supplementary file 1 [file get_supplementary_file.php]
